# Supplementary material
Source: PubMed Central journal article supplement (PMC5818288)

## Supporting Information

### **Peptide-targeted, stimuli-responsive polymersomes for delivering a cancer stemness inhibitor to cancer stem cell microtumors**

Fataneh Karandish <sup>a</sup>, James Froberg <sup>b</sup>, Pawel Borowicz <sup>c</sup>, John C. Wilkinson <sup>d</sup>, Yongki Choi <sup>b</sup>, Sanku Mallik <sup>a\*</sup>

<sup>a</sup> *Department of Pharmaceutical Sciences, North Dakota State University, Fargo, ND 58108*

<sup>b</sup> *Department of Physics, North Dakota State University, Fargo, ND 58108*

<sup>c</sup> *Department of Animal Sciences, North Dakota State University, Fargo, ND 58108*

<sup>d</sup> *Department of Chemistry and Biochemistry, North Dakota State University, Fargo, ND 58108*

#### **Corresponding Author**

\*E-mail: Sanku.Mallik@ndsu.edu. Phone: 701-231-7888. Fax: 701-231-7831.

Present Address

Department of Pharmaceutical Sciences, North Dakota State, University, Fargo, North Dakota, 58108.

## Table of Contents

|                                                                                                                                                                                               |   |
|-----------------------------------------------------------------------------------------------------------------------------------------------------------------------------------------------|---|
| Figure S1. CD spectra of hexynoic acid conjugated iRGD peptide before (blue) and after reaction [2+3]-cycloaddition with N <sub>3</sub> -PEG <sub>1900</sub> -PLA <sub>6000</sub> (red):..... | 3 |
| Figure S2. FT-IR characterization of iRGD peptide before and after reaction with N <sub>3</sub> -PEG <sub>1900</sub> -PLA <sub>6000</sub> .....                                               | 4 |
| Figure S3. MALDI mass spectrum for hexynoic acid conjugated iRGD peptide.....                                                                                                                 | 5 |
| Figure S4. Band Intensity of neuropilin-1 receptor in prostate and pancreatic cancer stem cells.....                                                                                          | 6 |
| Figure S5. Band Intensity of Nanog expression in prostate cancer stem cells (monolayer culture) after treatment.....                                                                          | 7 |
| Figure S6. Band Intensity of Notch-1 expression in prostate cancer stem cells after treatment.....                                                                                            | 8 |

Figure S1. CD spectra of hexynoic acid conjugated iRGD peptide before (blue) and after reaction [2+3]-cycloaddition with N<sub>3</sub>-PEG<sub>1900</sub>-PLA<sub>6000</sub> (red):

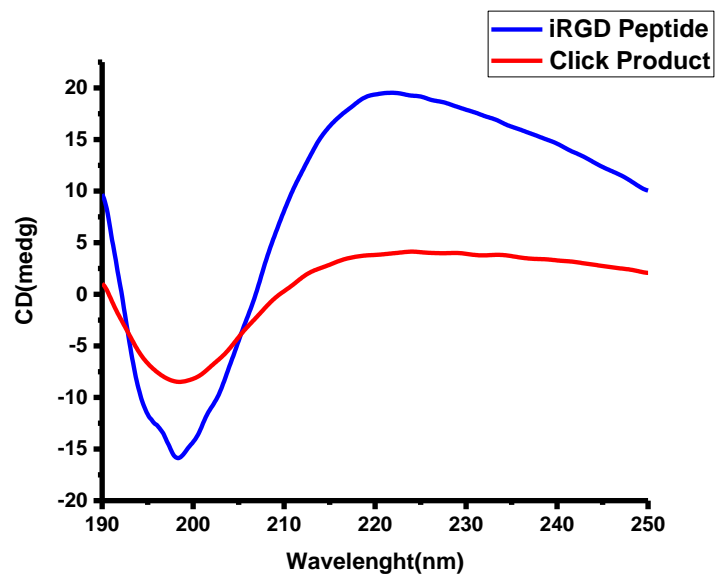

Figure S2. FT-IR characterization of iRGD peptide before and after reaction with  $N_3$ -PEG<sub>1900</sub>-PLA<sub>6000</sub>

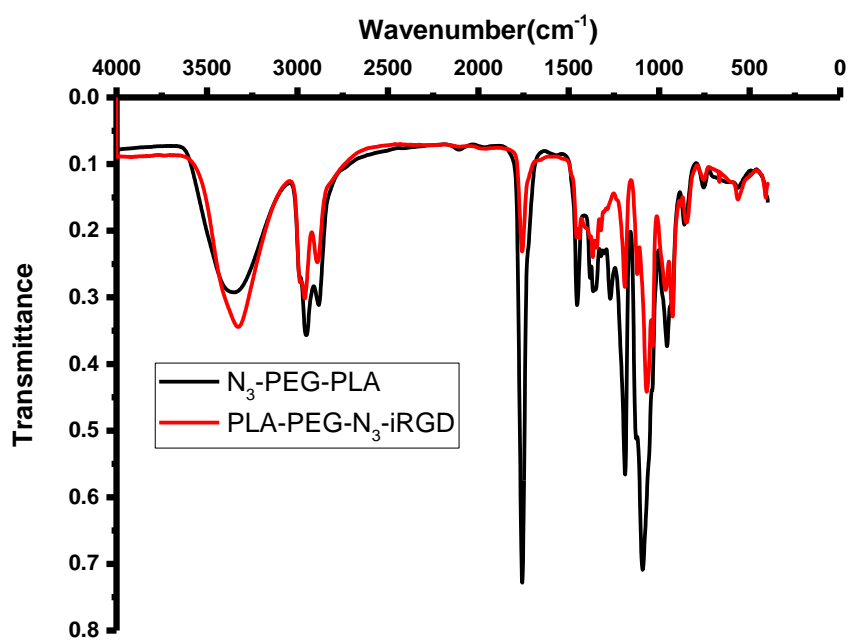

Figure S3. MALDI mass spectrum for hexynoic acid conjugated iRGD peptide.

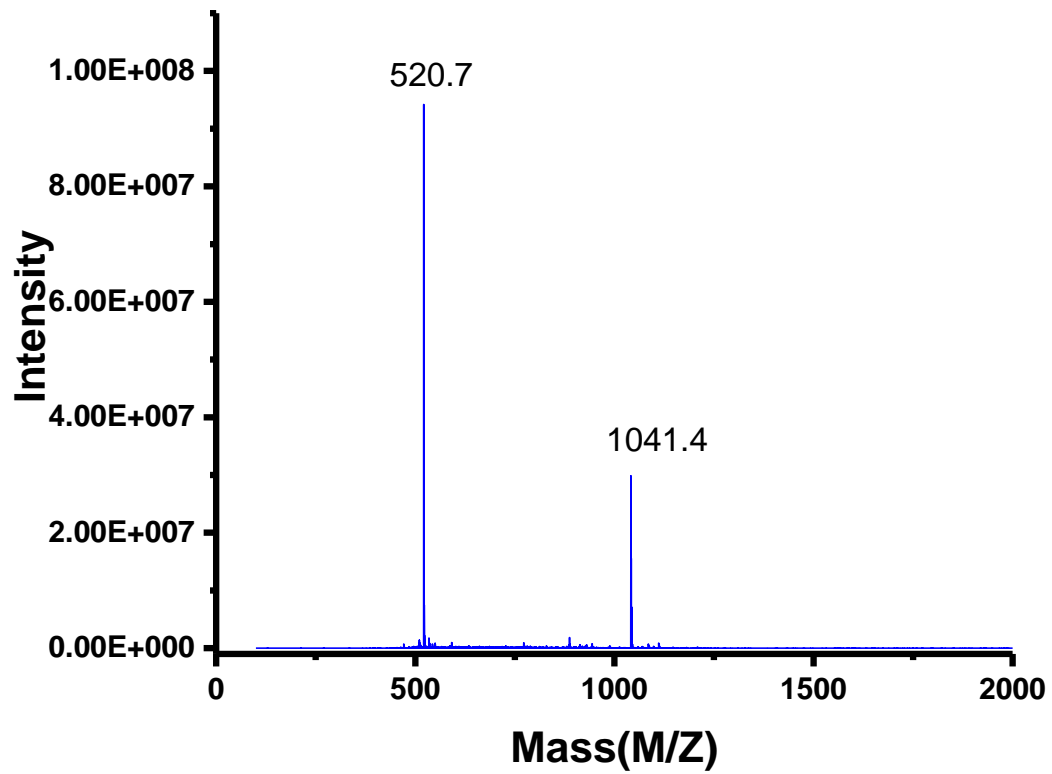

Observed mass: 1041.4, Calculated mass: 1042.0

Figure S4. Band Intensity of neuropilin-1 receptor in prostate and pancreatic cancer stem cells

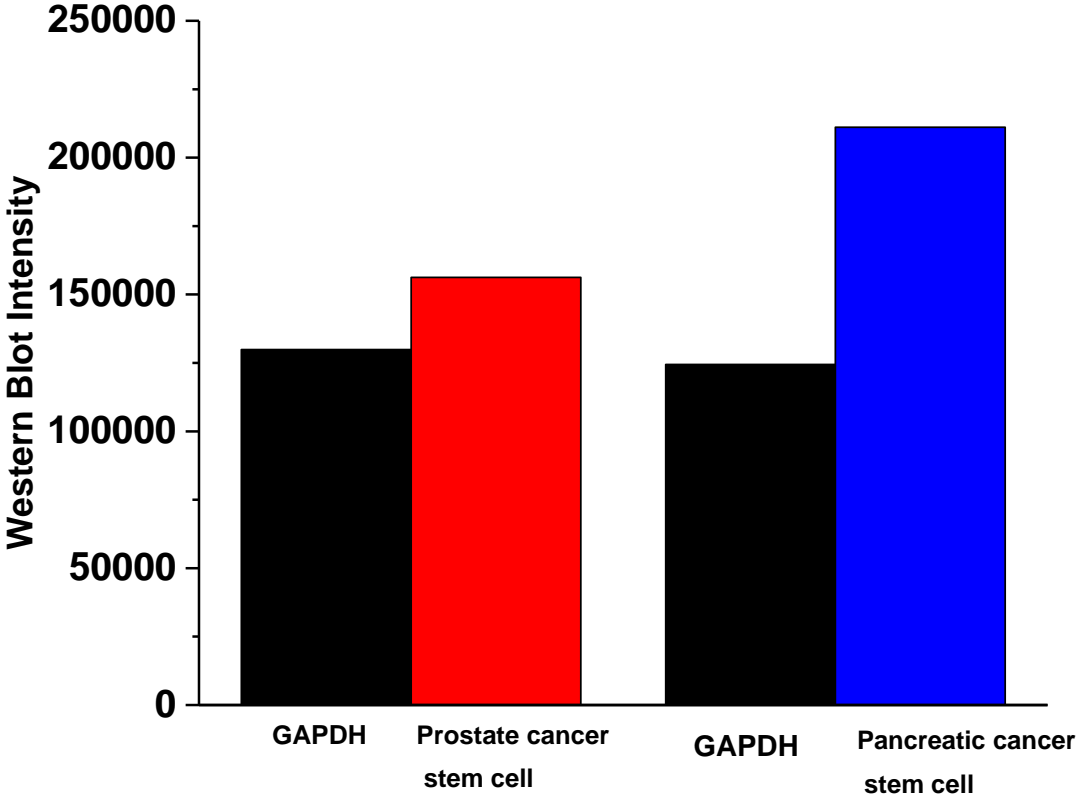

The errors are less than 10% for the intensity measurements.

Figure S5. Band Intensity of Nanog expression in prostate cancer stem cells (monolayer culture) after treatment

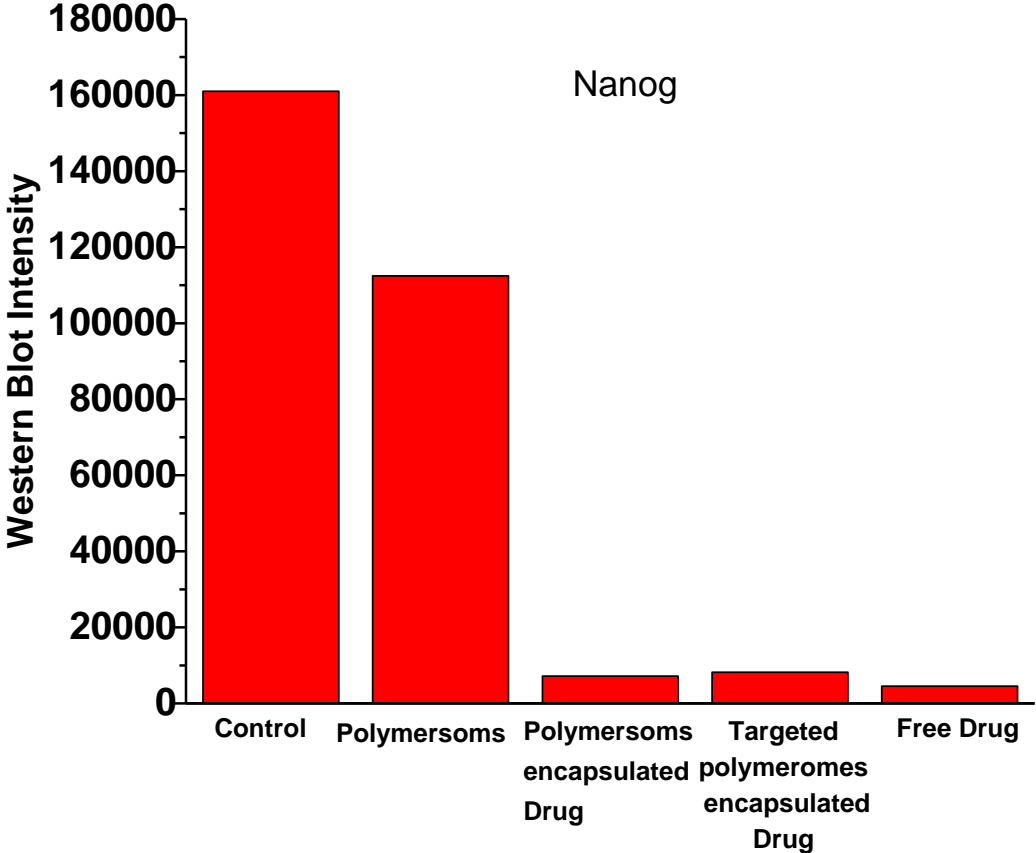

The errors are less than 10% for the intensity measurements.

Figure S6. Band Intensity of Notch-1 expression in prostate cancer stem cells after treatment

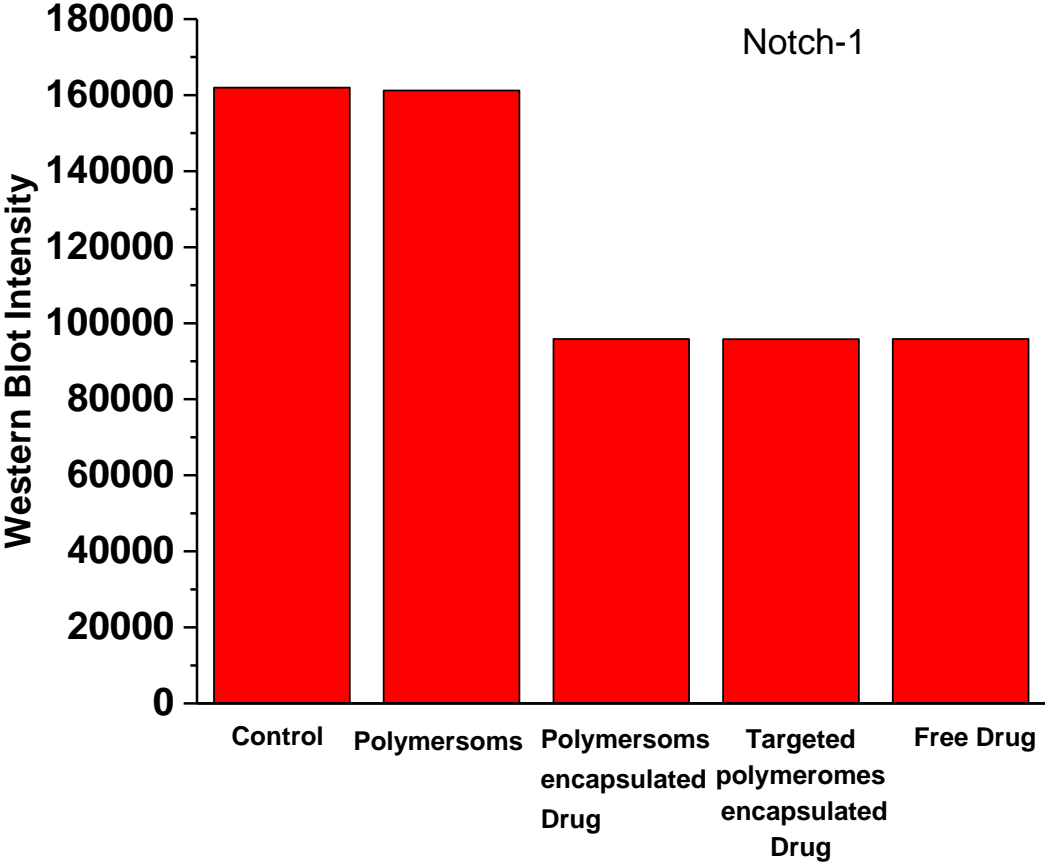

Supplement: NIHMS931839-supplement.pdf [file NIHMS931839-supplement.pdf]
